# Supplementary material for: Solution-Processed Nanowire Coating for Light Management in Organic Solar Cells
Source: Hindawi journal article supplement (doi:10.1155/2012/387586), 2012-01-01
Supplement: f1 [file 387586.f1.pdf]

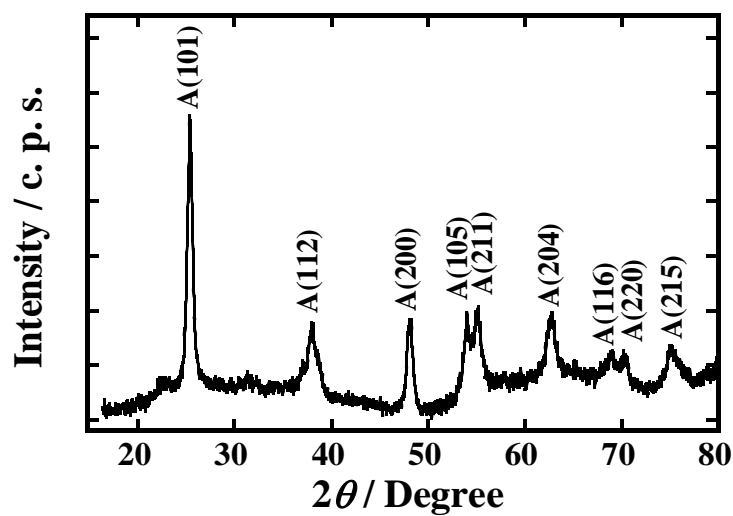

Figure S1. XRD pattern of  $\text{TiO}_2$  nanofibers with the indicate lattice planes corresponding to anatase phase

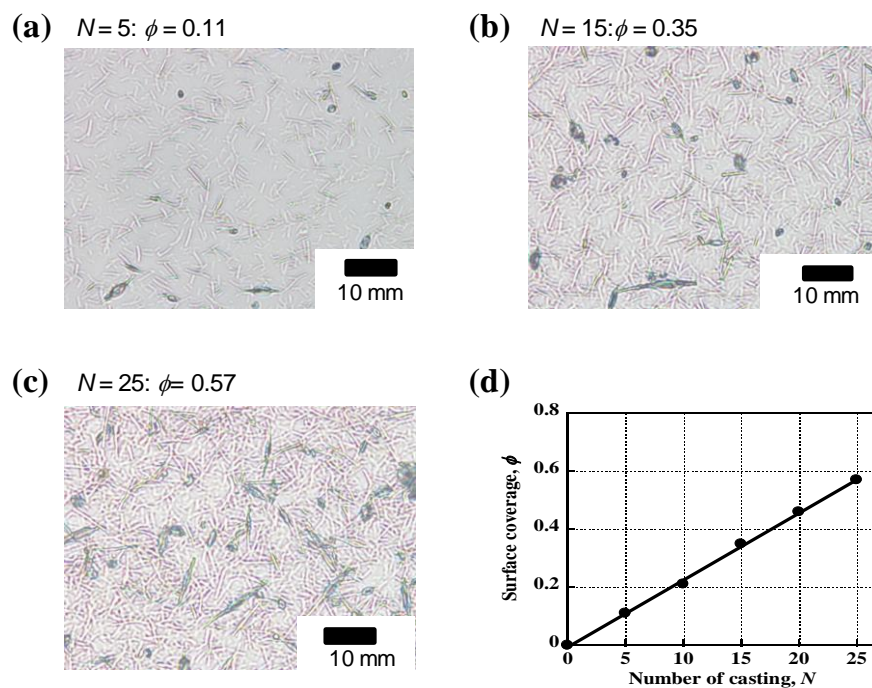

Figure S2.

Figure S2. (a)-(c) Optical micrographs of  $\text{TiO}_2$  NW coatings prepared on thin glass slides with various coverage fractions (d) Relationship between the coverage fraction,  $\phi$ , and number of castings,  $N$ .
